# Supplementary material for: Oral pharmacological chaperone migalastat compared with enzyme replacement therapy in Fabry disease: 18-month results from the randomised phase III ATTRACT study
Source: PubMed Central journal article supplement — J Med Genet. 2016 Nov 10;54(4):288–96. doi: 10.1136/jmedgenet-2016-104178 (PMC5502308; doi:10.1136/jmedgenet-2016-104178), 2016-11-10
Supplement: jmedgenet-2016-104178supp001.pdf [file jmedgenet-2016-104178supp001.pdf]

**Figure S1. LVMi Change over 18 months on Migalastat and ERT**

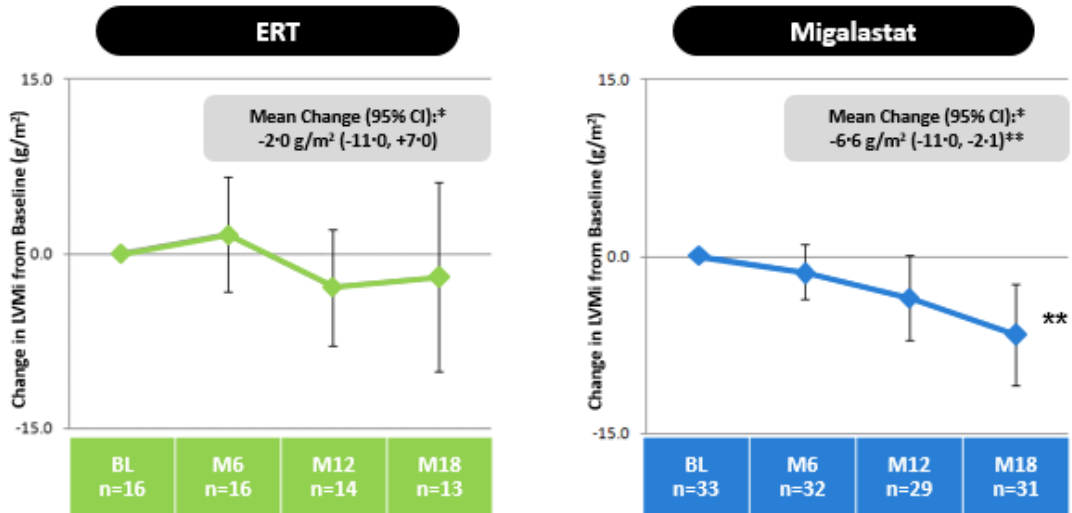

Mean change to month 18 in mITT patients (all randomized, treated patients with amenable mutations); LVMi decreased significantly (95% CI does not overlap zero) in patients switched to migalastat (-6.6g/m<sup>2</sup> [-11.0,-2.2]); a smaller non-significant change was observed in the ERT group (-2.0 g/m<sup>2</sup> [-11.0, 7.0]). Abbreviations: LVMi, left ventricular mass index; mITT, modified intention-to-treat; CI, confidence interval; B, baseline, M, month.

**Figure S2. Change in Lyso-Gb<sub>3</sub> from Baseline to Month 18 in Patients with Amenable Mutations Grouped by Prior ERT and Gender**

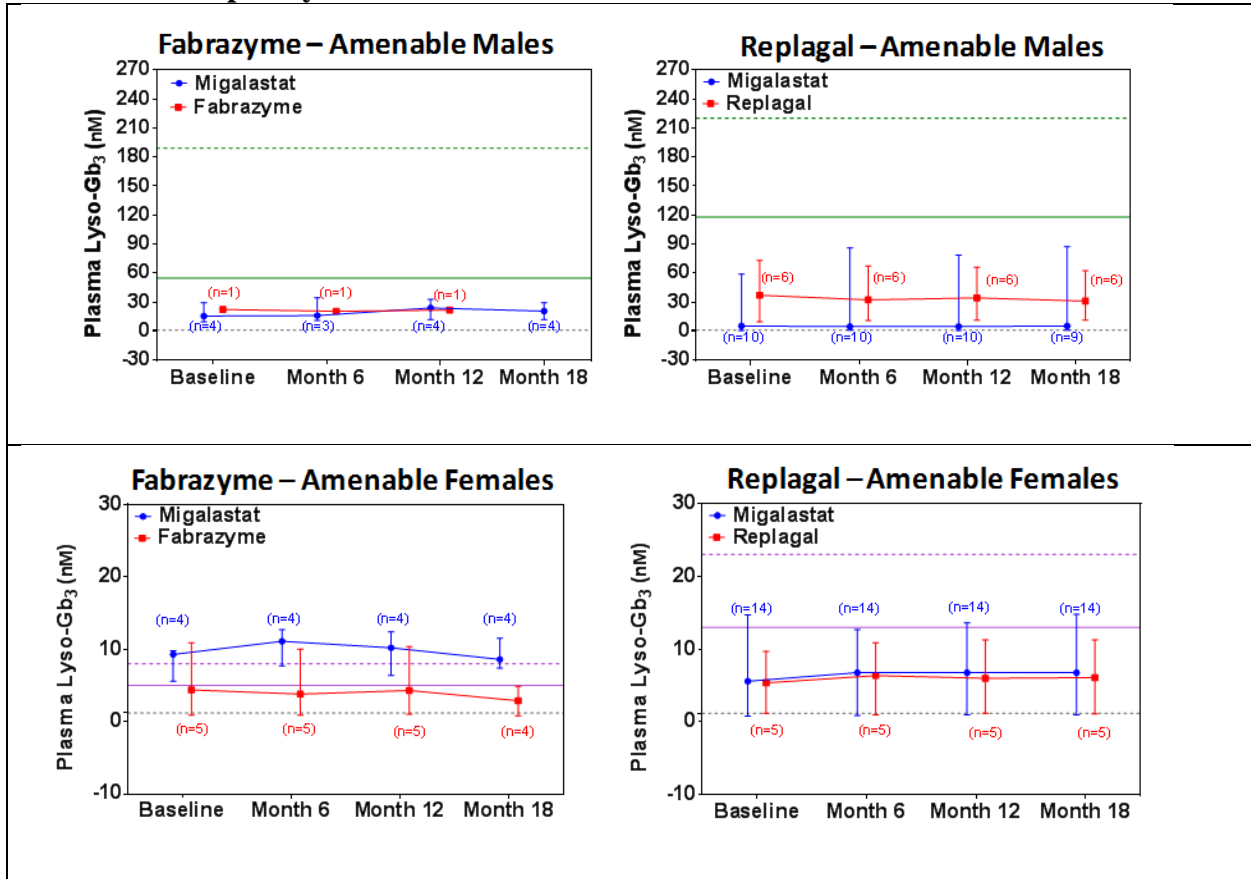

Data points are median values; error bars represent the range. The blue dotted line represents upper range of the normal plasma lyso-Gb<sub>3</sub> reference range (1·19 nM).

Upper figure (males): Baseline and median values in a cohort of classical phenotype males after 1 year of agalsidase beta treatment were 189 nM and 55 nM, respectively (dotted and solid green lines in graph on left, respectively). Baseline and median values in a cohort of classical phenotype males after 1 year of agalsidase alfa treatment were 220 nM and 118 nM, respectively (dotted and solid green lines in graph on right, respectively).

Lower figure (females): Baseline and median values in a cohort of classical phenotype females after 1 year of agalsidase beta treatment were 8 nM and 5 nM, respectively (dotted and solid purple lines in graph on left, respectively). Baseline and lowest median values in a cohort of classical phenotype females after 1 year of ERT treatment were 23 nM and 13 nM, respectively (dotted and solid purple lines in graph on right, respectively).(1)

**Table S1. Baseline Assessment of Disease Severity**

| <b>Sex</b>      | <b>Fabry Disease in <math>\geq 2</math> Organ Systems</b> | <b>Angio-keratoma or Corneal Whorling</b> | <b>Cardiac Events</b> | <b>CNS Events</b> | <b>Neuro-pathic Pain</b> | <b>Renal Impairment</b> | <b>Gastro-intestinal Symptoms</b> |
|-----------------|-----------------------------------------------------------|-------------------------------------------|-----------------------|-------------------|--------------------------|-------------------------|-----------------------------------|
| Male<br>n (%)   | 21/23 (87)                                                | 13/23 (57)                                | 15/23 (65)            | 17/23 (74)        | 14/23 (61)               | 17/23 (74)              | 14/23 (61)                        |
| Female<br>n (%) | 29/33 (88)                                                | 16/33 (48)                                | 25/33 (75)            | 12/33 (36)        | 22/33 (67)               | 25/33 (76)              | 20/33 (61)                        |

Includes randomized patients with amenable mutations. Angiokeratoma, corneal whorling, neuropathic pain, and gastrointestinal symptoms based on medical history finding. Cardiac involvement includes previous cardiac event (based on medical history), LVH, or conduction abnormality (eg, tachycardia, ST-T segment abnormality) based on medical history finding or baseline assessment of LVMi. CNS involvement was based on medical history findings (stroke/TIA, tinnitus/hearing loss). Renal involvement based on medical history finding or baseline eGFR < 90 mL/min/1.73m<sup>2</sup>, 24-hr protein  $\geq$  150 mg. CNS, central nervous system, LVH, left ventricular hypertrophy, LVMi, left ventricular mass index; TIA, transient ischemic attack; eGFR, estimated glomerular filtration rate.

**Table S2. Baseline Characteristics in Study 012 versus ERT Registries**

|                             | Male Patients |    |                    | Female Patients |                 |                    |
|-----------------------------|---------------|----|--------------------|-----------------|-----------------|--------------------|
|                             | FOS           | FR | 012                | FOS             | FR              | 012                |
| Age at enrolment            | 39            | 40 | 47/44 <sup>1</sup> | 44              | 44              | 50/47 <sup>1</sup> |
| Body System involvement (%) |               |    |                    |                 |                 |                    |
| Dermatologic                | 78            | 31 | 38                 | 50              | 12              | 21                 |
| Cardiac                     | 69            | 13 | 67                 | 65              | 10              | 75                 |
| CNS                         | 69            | 17 | 75                 | 74 <sup>2</sup> | 16 <sup>3</sup> | 36                 |
| Neuroparesthesias           | 76            | 62 | 58                 | 64              | 41              | 67                 |
| Renal                       | 50            | 17 | 75                 | 50              | 11              | 76                 |
| Gastrointestinal            | 55            | 19 | 58                 | 50              | 13              | 61                 |

Abbreviations: CNS = Central Nervous System; FOS = Fabry Outcomes Survey; FR = Fabry Registry; TIA = transient ischaemic attack | <sup>1</sup> Second number reflects age at start of ERT which is more relevant comparison to age at enrolment into ERT registry; <sup>2</sup> Combines auditory and TIA/Stroke; <sup>3</sup> Combines cerebrovascular and neurological: other | Sources: Fabry Outcomes Survey (2); Fabry Registry (3, 4).

**Table S3. Amenable Mutations of Enrolled and Treated Patients and the Corresponding Clinical Phenotype with supportive references from the Medical Literature**

| <b>Amino Acid Change<br/>(number of patients<br/>with the mutation)</b> | <b>Literature<br/>Phenotype /<br/>Reference(s)</b> | <b>Amino Acid Change</b> | <b>Literature<br/>Phenotype /<br/>Reference(s)</b> |
|-------------------------------------------------------------------------|----------------------------------------------------|--------------------------|----------------------------------------------------|
| p.M96I                                                                  | Nonclassic                                         | p.G260A                  | Classic(5)                                         |
| p.L32P (n = 3)                                                          | Unknown*                                           | p.Q279E                  | Nonclassic(6)                                      |
| p.G35R                                                                  | Nonclassic(7)                                      | p.M284T                  | Classic(8)                                         |
| p.D55V/Q57L                                                             | Unknown*                                           | p.M296I                  | Nonclassic(9)                                      |
| p.G85D (n = 4)                                                          | Unknown*                                           | p.R301P (n = 3)          | Classic(10)                                        |
| p.A97V                                                                  | Nonclassical(11)                                   | p.R301Q                  | Both(6, 12-14)                                     |
| p.R112G                                                                 | Unknown*                                           | p.G328A                  | Classic(15)                                        |
| p.R112H                                                                 | Nonclassic(16)                                     | p.Q312R                  | Nonclassic(17)                                     |
| p.A143T (n = 3)                                                         | Nonclassic(18)                                     | p.D322E (n = 4)          | Classic(19)                                        |
| p.A156T (n = 6)                                                         | Classic(20)                                        | p.R356Q                  | Nonclassic(21)                                     |
| p.P205T                                                                 | Classical(22)                                      | p.R363H                  | Both(23, 24)                                       |
| p.N215S (n = 10)                                                        | Nonclassic(25)                                     | p.L403S                  | Classic(17)                                        |
| p.Y216C                                                                 | Classic(26)                                        | p.P409T                  | Unknown*                                           |
| p.I253S                                                                 | Unknown*                                           |                          |                                                    |

Number of patients with each mutation is 1 unless indicated otherwise. \* Ten of these 11 patients including at least one patient for each of the six unique mutations with an unknown phenotype (3 of 4 for p.G85D) had baseline disease in  $\geq 2$  organ systems.

To date, 269 *GLA* mutations have been categorized as amenable to migalastat based on the GLP HEK assay.

**Table S4. Echocardiography-Derived Changes in Patients with Amenable Mutations**

| <b>Parameter</b>                                                      | <b>Baseline Mean</b> | <b>Month 18</b>                   |
|-----------------------------------------------------------------------|----------------------|-----------------------------------|
| <b>Migalastat: Left Ventricular Ejection Fraction (%±SEM) (n= 33)</b> | 64.0±0.51            | -1.07±0.53 (change from baseline) |
| <b>ERT: Left Ventricular Ejection Fraction (%±SEM) (n= 17)</b>        | 61.1±1.0             | -0.49±1.1 (change from baseline)  |
| <b>Migalastat: Diastolic Grade (n, %)</b>                             |                      |                                   |
| <b>Normal</b>                                                         | 19 (61%)             | 20 (65%)                          |
| <b>Impaired Relaxation</b>                                            | 3 (10%)              | 4 (13%)                           |
| <b>Restrictive Filling</b>                                            | 9 (29%)              | 7 (23%)                           |
| <b>ERT: Diastolic Grade (n, %)</b>                                    |                      |                                   |
| <b>Normal</b>                                                         | 9 (53%)              | 10 (67%)                          |
| <b>Impaired Relaxation</b>                                            | 3 (19%)              | 0                                 |
| <b>Restrictive Filling</b>                                            | 5 (29%)              | 5 (33%)                           |
| <b>Migalastat: Systolic Grade (n, %)</b>                              |                      |                                   |
| <b>Normal</b>                                                         | 33 (100%)            | 33 (97%)                          |
| <b>Mildly Abnormal</b>                                                | 0                    | 1 (3%)                            |
| <b>Moderately Abnormal</b>                                            | 0                    | 0                                 |
| <b>ERT: Systolic Grade (n, %)</b>                                     |                      |                                   |
| <b>Normal</b>                                                         | 16 (94%)             | 11 (79%)                          |
| <b>Mildly Abnormal</b>                                                | 1 (6%)               | 2 (14%)                           |
| <b>Moderately Abnormal</b>                                            | 0                    | 1 (7%)                            |

Diastolic grades were based on E/A ratio: impaired relaxation <0.75, normal 0.75-1.5, restrictive filling >1.5. Systolic grades were based on ejection fraction: normal ≥55, mildly abnormal 45-54, moderately abnormal 30-44.

**Table S5: Patient-Reported Outcomes**

| Assessment                    | Baseline (Mean±SEM) |           | Change from Baseline to Month 18<br>[Mean (95% CI)] |                     |
|-------------------------------|---------------------|-----------|-----------------------------------------------------|---------------------|
|                               | Migalastat          | ERT       | Migalastat                                          | ERT                 |
| <b>SF-36v2</b>                |                     |           |                                                     |                     |
| n                             | 34                  | 16        | 31                                                  | 16 <sup>1</sup>     |
| Physical component            | 47.8±1.9            | 40.4±2.7  | 0.96 (-1.0, 2.9)                                    | -1.92 (-6.7, 2.8)   |
| Mental component              | 49.3±1.8            | 50.6±2.6  | 0.08 (-3.3, 3.4)                                    | -0.41 (-4.3, 3.5)   |
| <b>BPI-SF (Pain Severity)</b> |                     |           |                                                     |                     |
| n                             | 34                  | 17        | 34                                                  | 17                  |
| Score                         | 1.29±0.31           | 2.12±0.56 | 0.15 (-0.56, 0.88)                                  | -0.19 (-0.98, 0.59) |

Based on all randomized patients with amenable mutations. SF-36v2=Short Form Health Survey with 36 questions, version 2 (higher score represent less disability; range for each component: 0-100) | BPI-SF= Brief Pain Inventory Short Form– pain severity component (higher scores represent more pain; range: 1-10); CI=confidence interval; ERT=enzyme replacement therapy; SEM=standard error of the mean.

<sup>1</sup>For change from baseline in the mental component of SF-36v2, n=17.

## REFERENCES

1. van Breemen MJ, Rombach SM, Dekker N, Poorthuis BJ, Linthorst GE, Zwinderman AH, et al. Reduction of elevated plasma globotriaosylsphingosine in patients with classic Fabry disease following enzyme replacement therapy. *Biochim Biophys Acta*. 2011;1812(1):70-6.
2. Mehta A, Beck M, Elliott P, Giugliani R, Linhart A, Sunder-Plassmann G, et al. Enzyme replacement therapy with agalsidase alfa in patients with Fabry's disease: an analysis of registry data. *Lancet*. 2009;374(9706):1986-96
3. Eng CM, Fletcher J, Wilcox WR, Waldek S, Scott CR, Sillence DO, et al. Fabry disease: baseline medical characteristics of a cohort of 1765 males and females in the Fabry Registry. *J Inher Metab Dis*. 2007;30(2):184-92 Epub 2007 Mar 8.
4. Fabry Registry Annual Report 2014. Genzyme, a Sanofi company, 2014.
5. Okumiya T, Ishii S, Takenaka T, Kase R, Kamei S, Sakuraba H, et al. Galactose stabilizes various missense mutants of  $\alpha$ -galactosidase in Fabry disease. *Biochem Biophys Res Commun*. 1995;214(3):1219-24.
6. Ishii S, Sakuraba H, and Suzuki, Y. Point mutations in the upstream region of the  $\alpha$ -Galactosidase A gene exon 6 in an atypical variant of Fabry disease. *Hum Genet*. 1992;89:29-32.
7. Davies J, Christomanou H, Winchester B, Malcolm S. Detection of 8 new mutations in the  $\alpha$ -galactosidase A gene in Fabry disease. *Hum Mol Genet*. 1994;3(4):667-9.
8. Blanch LC, Meaney C, Morris CP. A sensitive mutation screening strategy for Fabry disease: Detection of nine mutations in the  $\alpha$ -galactosidase A gene. *Hum Mutat*. 1996;8(1):38-43.
9. Nakao S, Takenaka T, Maeda M, Kodama C, Tanaka A, Tahara M, Yoshida A, Kuriyama M, Hayashibe H, Sakuraba H, and Tanaka H. An atypical variant of Fabry's disease in men with left ventricular hypertrophy. *N Engl J Med*. 1995;333:288-93.
10. Ashley GA, Shabbeer J, Yasuda M, Eng CM, Desnick RJ. Fabry disease: twenty novel  $\alpha$ -galactosidase A mutations causing the classical phenotype. *J Hum Genet*. 2001;46(4):192-6.
11. Eng CM, Ashley G. A., Burgert T. S., Enriquez A. L., D'Souza M., and Desnick R. J. Fabry disease: Thirty-five mutations in the  $\alpha$ -galactosidase A gene in patients with classic and variant phenotypes. *Mol Med*. 1997;3:174-82.
12. Sakuraba H, Oshima A, Fukuhara Y, Shimmoto M, Nagao Y, Bishop DF, et al. Identification of point mutations in the  $\alpha$ -galactosidase A gene in classical and atypical hemizygotes with Fabry disease. *Am J Hum Genet*. 1990;47(5):784-9.
13. Germain DP, Poenaru L. Fabry Disease: Identification of Novel  $\alpha$ -Galactosidase A Mutations and Molecular Carrier Detection by Use of Fluorescent Chemical Cleavage of Mismatches. *Biochem Biophys Res Commun*. 1999;257(3):708-13.
14. Germain DP, Shabbeer J, Cotigny S, Desnick RJ. Fabry disease: twenty novel  $\alpha$ -galactosidase A mutations and genotype-phenotype correlations in classical and variant phenotypes. *Mol Med*. 2002;8(6):306-12.
15. Eng CM, Resnick-Silverman L. A., Niehaus D. J., Astrin K. H., and Desnick R. J. Nature and frequency of mutations in the  $\alpha$ -galactosidase A gene that cause Fabry disease. *Am J Hum Genet*. 1993;53:1186-97.
16. Eng CM, Niehaus DJ, Enriquez AL, Burgert TS, Ludman MD, Desnick RJ. Fabry disease: twenty-three mutations including sense and antisense CpG alterations and identification of a deletional hot-spot in the  $\alpha$ -galactosidase A gene. *Hum Mol Genet*. 1994;3(10):1795-9.
17. Shimotori M, Maruyama H, Nakamura G, Suyama T, Sakamoto F, Itoh M, et al. Novel mutations of the GLA gene in Japanese patients with Fabry disease and their functional characterization by active site specific chaperone. *Hum Mutat*. 2008;29(2):331.



18. Spada M, Pagliardini S, Yasuda M, Tükel T, Thiagarajan G, Sakuraba H, et al. High incidence of later-onset Fabry disease revealed by newborn screening. *Am J Hum Genet.* 2006;79(1):31-40.
19. Lee BH, Heo SH, Kim G-H, Park J-Y, Kim W-S, Kang D-H, et al. Mutations of the GLA gene in Korean patients with Fabry disease and frequency of the E66Q allele as a functional variant in Korean newborns. *J Hum Genet.* 2010;55(8):512-7.
20. Eng CM, and Desnick, R. J. Molecular basis of Fabry disease: mutations and polymorphisms in the human  $\alpha$ -galactosidase A gene. *Hum Mutat.* 1994;3:103-11.
21. Chien Y-H, Olivova P, Zhang XK, Chiang S-C, Lee N-C, Keutzer J, et al. Elevation of urinary globotriaosylceramide (GL3) in infants with Fabry disease. *Mol Genet Metab.* 2011;102(1):57-60.
22. Blanch L, Weber B, Guo XH, Scott HS, Hopwood JJ. Molecular defects in Sanfilippo syndrome type A. *Hum Mol Genet.* 1997;6(5):787-91.
23. Shabbeer J, Yasuda M, Luca E, Desnick RJ. Fabry disease: 45 novel mutations in the  $\alpha$  - galactosidase A gene causing the classical phenotype. *Mol Genet Metab.* 2002;76(1):23-30.
24. Blaydon D, Hill J, Winchester B. Fabry disease: 20 novel GLA mutations in 35 families. *Hum Mutat.* 2001;18(5):459-.
25. Dobrovolny R, Dvorakova L, Ledvinova J, Magage S, Bultas J, Lubanda JC, et al. Relationship between X-inactivation and clinical involvement in Fabry heterozygotes. Eleven novel mutations in the  $\alpha$ -galactosidase A gene in the Czech and Slovak population. *J Mol Med.* 2005;83(8):647-54 Epub 2005 Apr 2.
26. Filoni C, Caciotti A, Carraresi L, Cavicchi C, Parini R, Antuzzi D, et al. Functional studies of new GLA gene mutations leading to conformational Fabry disease. *Biochim Biophys Acta.* 2010;1802(2):247-52.
